# Supplementary material for: Coronavirus surveillance in wildlife from two Congo basin countries detects RNA of multiple species circulating in bats and rodents
Source: PubMed Central journal article supplement (PMC8189465; doi:10.1371/journal.pone.0236971), 2021-06-09

**A**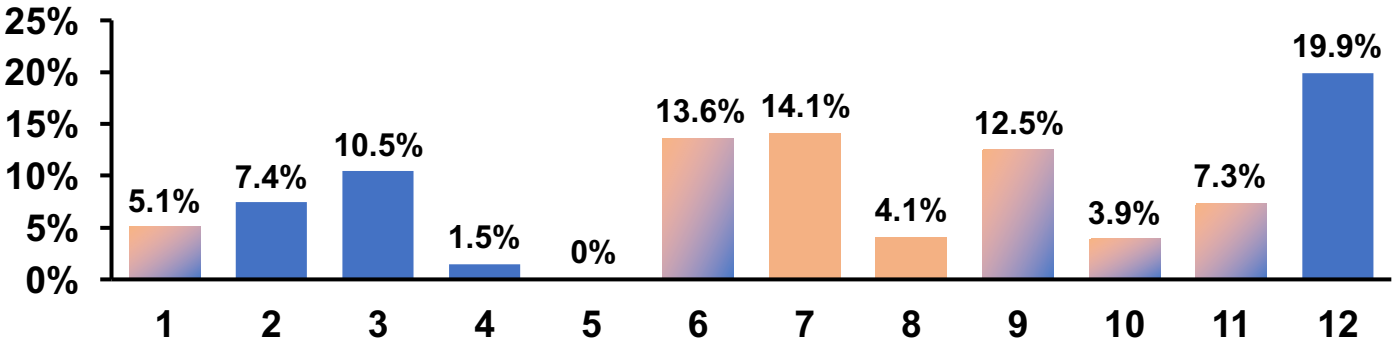**B**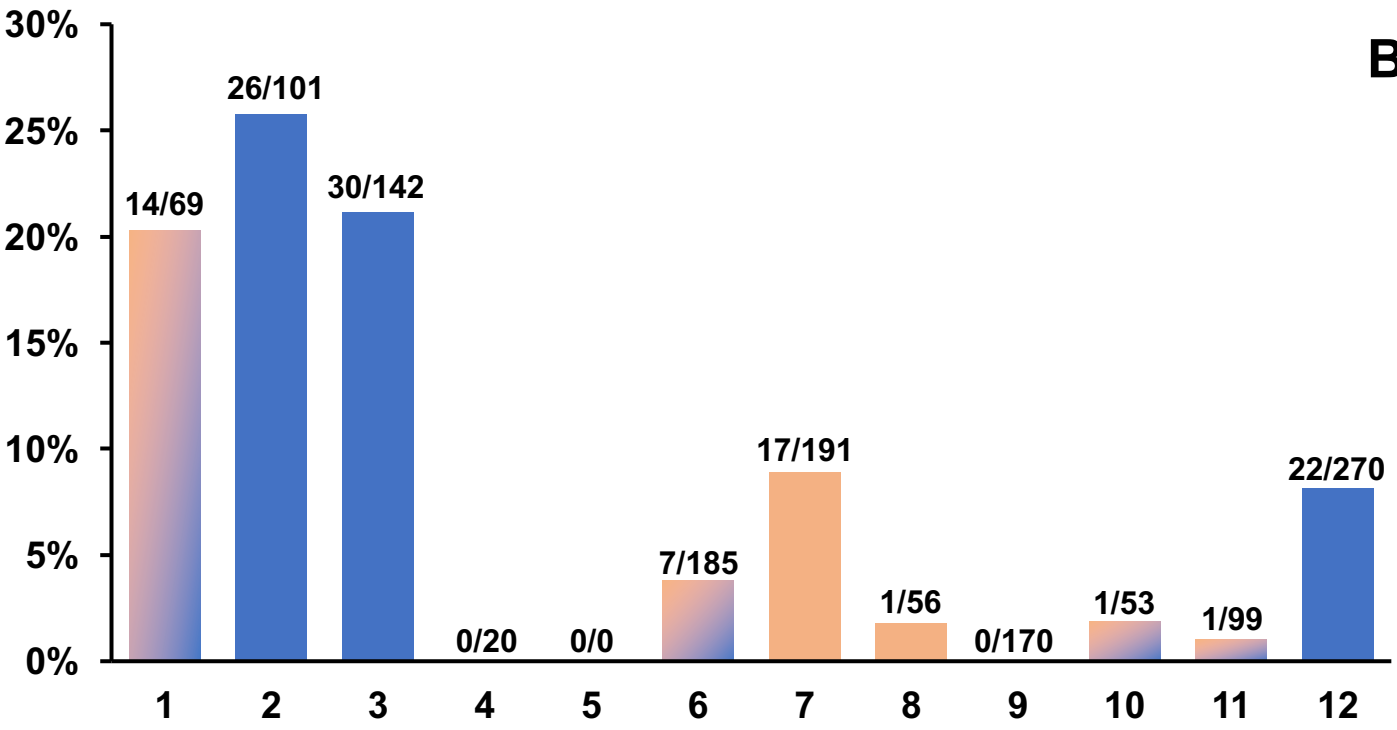**C**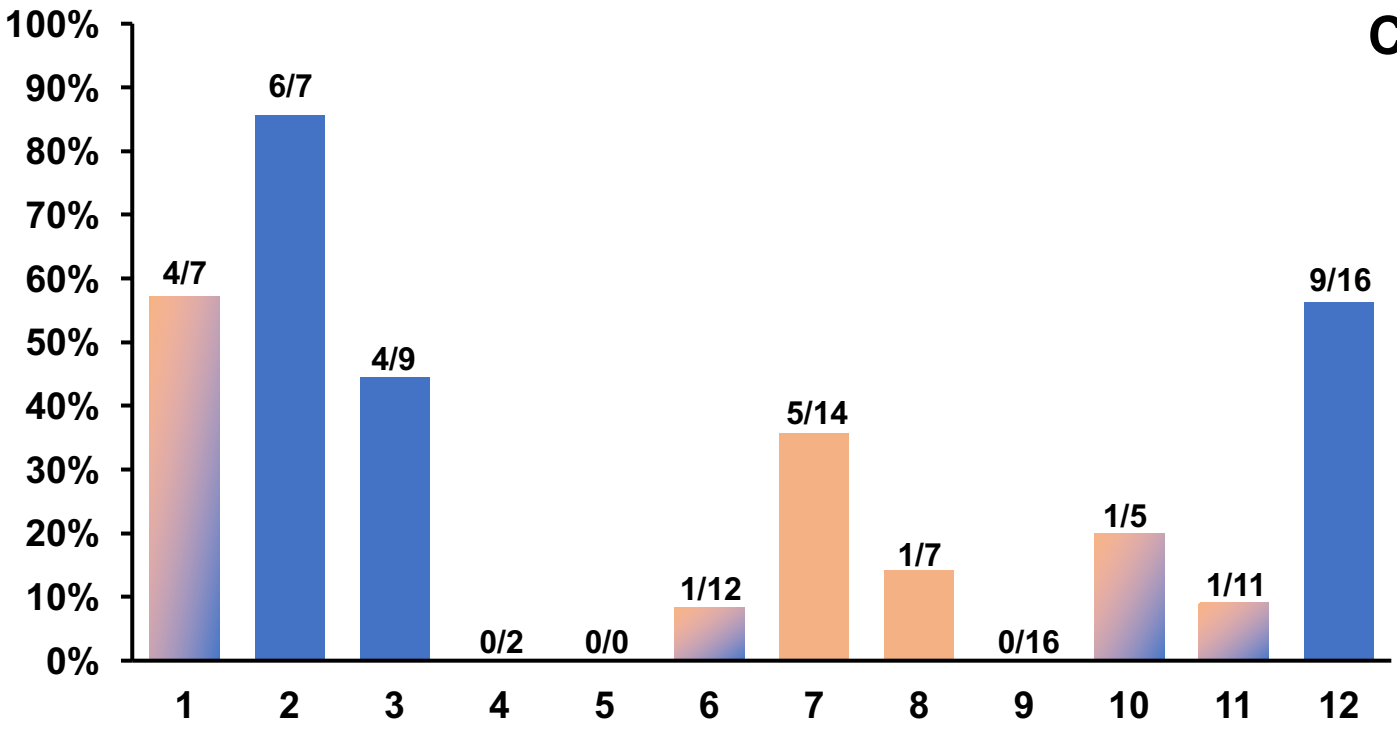

Supplement: pone.0236971.s002.pdf [file pone.0236971.s002.pdf]
